# Supplementary material for: Carboxyl-functionalized polyurethane nanoparticles with immunosuppressive properties as a new type of anti-inflammatory platform
Source: Royal Society of Chemistry journal article supplement (doi:10.1039/c5nr06379e), 2015-01-01
Supplement: c5nr06379e1.pdf [file c5nr06379e1.pdf]

## Supporting Information

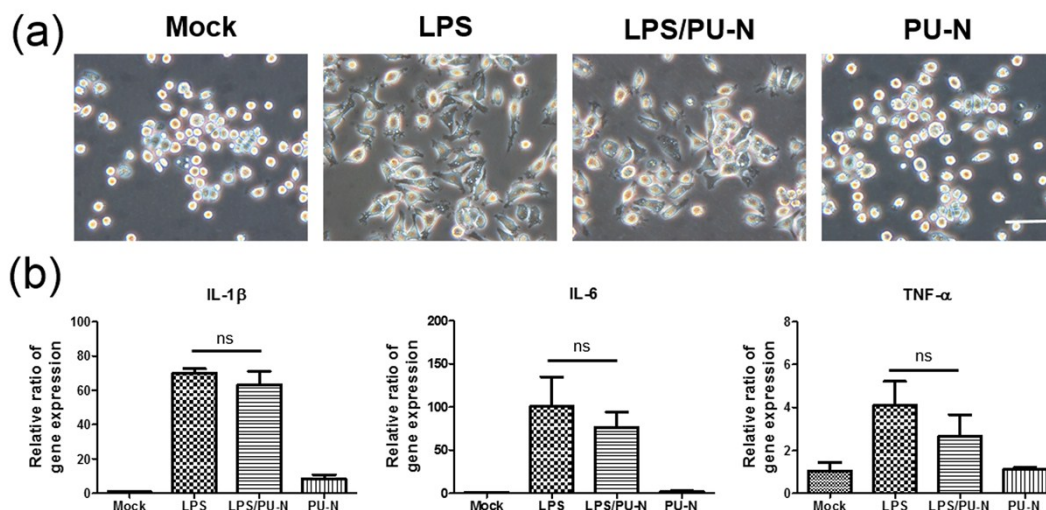

**Fig. S1** (a) The morphologies of macrophages after incubation with PU-N (50  $\mu\text{g/ml}$ ) for 24 h. Scale bar represents 100  $\mu\text{m}$ . (b) The mRNA expressions of proinflammatory cytokine genes after incubation of PU-N (50  $\mu\text{g/ml}$ ) and LPS (100  $\text{ng/ml}$ ) for 24 h. Synthesis of positively charged PU-N was described in Materials and Methods. The zeta potential was  $\sim 58$  mV. ns, no significant difference.
